# Supplementary material for: N2O production, a widespread trait in fungi
Source: PubMed Central journal article supplement (PMC4403702; doi:10.1038/srep09697), 2015-04-20
Supplement: srep09697-s1.pdf [file srep09697-s1.pdf]

## **Supplemental information**

**Manuscript title: N<sub>2</sub>O production, a widespread trait in fungi**

Author list: Koki Maeda<sup>1,2\*</sup>, Aymé Spor<sup>2</sup>, Véronique Edel-Hermann<sup>2</sup>, Cécile Heraud<sup>2</sup>,  
Marie-Christine Breuil<sup>2</sup>, Florian Bizouard<sup>2</sup>, Sakae Toyoda<sup>3</sup>, Naohiro Yoshida<sup>3,4,5</sup>, Christian  
Steinberg<sup>2</sup> and Laurent Philippot

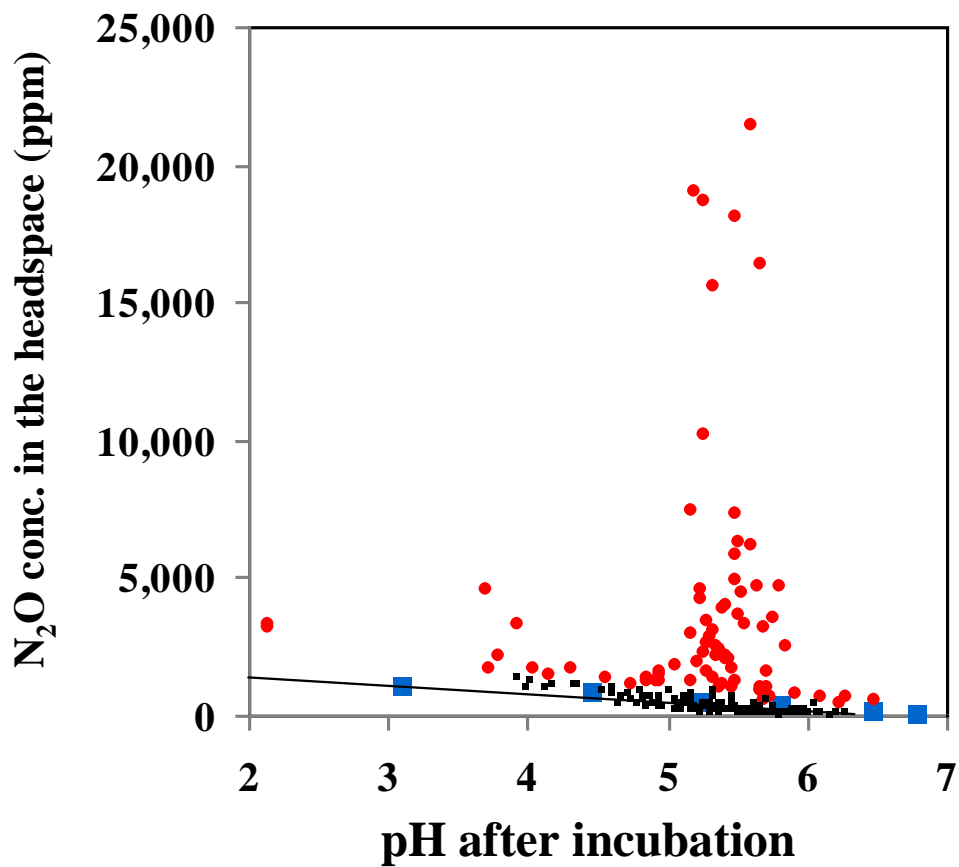

**Figure S1:** Relationship between N<sub>2</sub>O concentrations and pH after incubation. Blue rectangles indicate the negative controls without fungi cultures. Red circles indicate the positive strains and black dots indicate the negative strains.

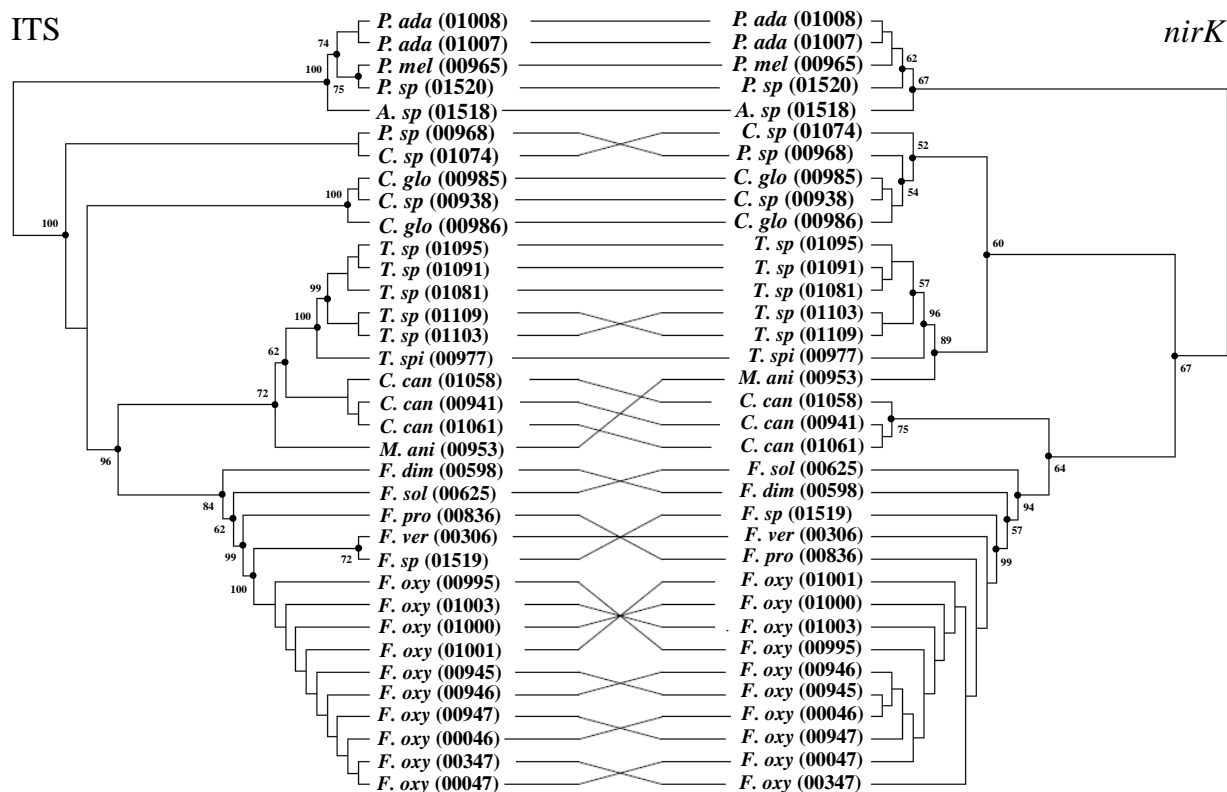

**Figure S2:** Congruence between the ITS (left) and nirK (right) phylogenies. This plot was generated using the cophyloplot function from the “ape” R package. Nodes with >50% (●) bootstrap support are indicated. The numbers in parentheses are MIAE numbers. Abbreviated strain names are used. The full names of the strains are given in Table S1.

Maeda et al., Table S1

Table S1  $\delta^{15}\text{N}_{\text{bulk}}$ ,  $\delta^{18}\text{O}$  and site preference (SP) values of produced  $\text{N}_2\text{O}$

| Strain Name                            | MIAE No. | SP (‰)      |     | $\delta^{15}\text{N}_{\text{bulk}}$ (‰) |      | $\delta^{18}\text{O}$ (‰) |     |
|----------------------------------------|----------|-------------|-----|-----------------------------------------|------|---------------------------|-----|
|                                        |          | average     | sd  | average                                 | sd   | average                   | sd  |
| <i>Absidia glauca</i>                  | 01056    | <b>23.9</b> | 3.0 | <b>1.6</b>                              | 0.1  | <b>31.4</b>               | 0.3 |
| <i>Aspergillus</i> sp.                 | 01518    | <b>24.7</b> | 5.6 | <b>-16.2</b>                            | 1.6  | <b>29.6</b>               | 2.4 |
| <i>Chaetomium</i> sp.                  | 00938    | <b>35.7</b> | 1.6 | <b>-0.7</b>                             | 1.9  | <b>42.5</b>               | 0.1 |
| <i>Chaetomium</i> sp.                  | 00985    | <b>31.8</b> | 0.3 | <b>-1.6</b>                             | 2.6  | <b>43.6</b>               | 2.4 |
| <i>Chaetomium</i> sp.                  | 00986    | <b>33.4</b> | 2.2 | <b>2.4</b>                              | 1.5  | <b>45.0</b>               | 1.2 |
| <i>Chaetomiaceae</i>                   | 00990    | <b>28.0</b> | 2.8 | <b>-4.1</b>                             | 1.7  | <b>32.9</b>               | 1.8 |
| <i>Cloridium</i> sp.                   | 01074    | <b>30.3</b> | 0.6 | <b>-8.0</b>                             | 0.2  | <b>33.6</b>               | 2.1 |
| <i>Cloridium virescens</i>             | 00939    | <b>34.0</b> | 7.0 | <b>-8.1</b>                             | 0.3  | <b>35.6</b>               | 1.1 |
| <i>C. virescens</i>                    | 01069    | <b>32.3</b> | 2.3 | <b>-8.7</b>                             | 0.1  | <b>33.9</b>               | 0.1 |
| <i>Clonostachys candelabrum</i>        | 00941    | <b>30.7</b> | 3.7 | <b>-19.2</b>                            | 1.8  | <b>41.8</b>               | 2.4 |
| <i>C. candelabrum</i>                  | 01058    | <b>34.6</b> | 3.9 | <b>-6.6</b>                             | 0.5  | <b>41.4</b>               | 0.8 |
| <i>C. candelabrum</i>                  | 01061    | <b>34.5</b> | 1.9 | <b>-7.8</b>                             | 0.3  | <b>38.9</b>               | 0.0 |
| <i>Colletotrichum coccodes</i>         | 01515    | <b>31.2</b> | 2.3 | <b>-21.9</b>                            | 0.3  | <b>36.7</b>               | 0.2 |
| <i>Fusarium acuminatum</i>             | 00244    | <b>33.2</b> | 1.2 | <b>-8.6</b>                             | 0.6  | <b>38.4</b>               | 0.7 |
| <i>F. ticinctum</i> species complex    | 00285    | <b>30.7</b> | 0.9 | <b>-6.5</b>                             | 0.7  | <b>38.2</b>               | 0.6 |
| <i>F. avenaceum</i>                    | 00286    | <b>36.3</b> | 1.8 | <b>-6.7</b>                             | 0.5  | <b>38.6</b>               | 0.6 |
| <i>F. dimerum</i>                      | 00598    | <b>27.9</b> | 1.9 | <b>-5.4</b>                             | 0.4  | <b>36.5</b>               | 0.1 |
| <i>F. proliferatum</i>                 | 00836    | <b>30.0</b> | 1.1 | <b>-6.7</b>                             | 0.2  | <b>30.4</b>               | 2.3 |
| <i>F. sambucinum</i>                   | 00301    | <b>36.7</b> | 2.2 | <b>-9.4</b>                             | 0.2  | <b>35.8</b>               | 0.1 |
| <i>F. solani</i>                       | 00625    | <b>30.0</b> | 1.6 | <b>-4.0</b>                             | 0.0  | <b>33.2</b>               | 0.0 |
| <i>F. oxysporum</i> f. sp. <i>Lini</i> | 00347    | <b>30.3</b> | 2.0 | <b>-1.8</b>                             | 1.4  | <b>37.5</b>               | 0.4 |
| <i>F. oxysporum</i>                    | 00046    | <b>35.7</b> | 2.7 | <b>0.9</b>                              | 3.6  | <b>36.6</b>               | 1.9 |
| <i>F. oxysporum</i>                    | 00047    | <b>34.1</b> | 0.7 | <b>5.9</b>                              | 2.5  | <b>35.9</b>               | 0.4 |
| <i>F. oxysporum</i>                    | 00945    | <b>31.4</b> | 5.0 | <b>-3.2</b>                             | 1.0  | <b>34.3</b>               | 2.9 |
| <i>F. oxysporum</i>                    | 00946    | <b>32.7</b> | 0.6 | <b>-5.5</b>                             | 0.6  | <b>34.8</b>               | 0.5 |
| <i>F. oxysporum</i>                    | 00947    | <b>23.0</b> | 2.8 | <b>-3.5</b>                             | 0.2  | <b>29.6</b>               | 0.2 |
| <i>F. oxysporum</i>                    | 00948    | <b>34.4</b> | 3.1 | <b>-1.7</b>                             | 2.3  | <b>37.3</b>               | 1.6 |
| <i>F. oxysporum</i>                    | 00996    | <b>33.4</b> | 5.0 | <b>0.8</b>                              | 2.5  | <b>37.6</b>               | 1.5 |
| <i>F. oxysporum</i>                    | 00991    | <b>32.2</b> | 2.0 | <b>-5.4</b>                             | 0.8  | <b>35.5</b>               | 0.2 |
| <i>F. oxysporum</i>                    | 00994    | <b>26.2</b> | 7.1 | <b>-2.9</b>                             | 1.5  | <b>34.1</b>               | 2.5 |
| <i>F. oxysporum</i>                    | 00998    | <b>30.5</b> | 1.8 | <b>-4.0</b>                             | 1.0  | <b>32.0</b>               | 0.6 |
| <i>F. oxysporum</i>                    | 01000    | <b>28.7</b> | 1.3 | <b>-2.2</b>                             | 0.1  | <b>33.0</b>               | 0.5 |
| <i>F. oxysporum</i>                    | 01001    | <b>32.7</b> | 0.8 | <b>-5.9</b>                             | 1.4  | <b>36.2</b>               | 1.9 |
| <i>F. oxysporum</i>                    | 01003    | <b>35.1</b> | 0.0 | <b>0.8</b>                              | 0.7  | <b>39.0</b>               | 0.8 |
| <i>Fusarium</i> sp.                    | 01519    | <b>30.4</b> | 5.1 | <b>-3.1</b>                             | 11.5 | <b>34.2</b>               | 4.0 |
| <i>F. verticillioides</i>              | 00306    | <b>27.2</b> | 4.8 | <b>-4.7</b>                             | 0.8  | <b>32.5</b>               | 3.9 |
| <i>Leptosphaeria</i> sp.               | 01060    | <b>29.0</b> | 7.2 | <b>-11.9</b>                            | 0.1  | <b>37.5</b>               | 0.1 |
| <i>Metarhizium anisopliae</i>          | 00953    | <b>30.5</b> | 0.3 | <b>-8.8</b>                             | 0.3  | <b>36.1</b>               | 0.0 |
| <i>Penicillium adametzii</i>           | 01007    | <b>20.6</b> | 2.4 | <b>1.7</b>                              | 1.2  | <b>30.6</b>               | 0.8 |
| <i>P. adametzii</i>                    | 01008    | <b>21.2</b> | 0.8 | <b>-0.4</b>                             | 1.8  | <b>32.2</b>               | 1.2 |
| <i>P. melinii</i>                      | 01009    | <b>19.2</b> | 1.7 | <b>3.3</b>                              | 0.3  | <b>31.5</b>               | 0.4 |
| <i>P. melinii</i>                      | 00965    | <b>15.8</b> | 2.6 | <b>2.5</b>                              | 0.8  | <b>29.4</b>               | 0.9 |
| <i>Penicillium</i> sp.                 | 01010    | <b>22.7</b> | 3.4 | <b>1.3</b>                              | 0.9  | <b>31.7</b>               | 0.6 |
| <i>Penicillium</i> sp.                 | 01520    | <b>19.0</b> | 2.2 | <b>1.1</b>                              | 0.6  | <b>31.9</b>               | 1.1 |
| <i>Phialocephala</i> sp.               | 00968    | <b>34.0</b> | 1.7 | <b>-21.8</b>                            | 1.9  | <b>36.4</b>               | 3.8 |
| <i>Trichoderma harzianum</i>           | 00042    | <b>30.0</b> | 4.0 | <b>-20.2</b>                            | 0.6  | <b>40.1</b>               | 2.1 |
| <i>T. harzianum</i> (anamorph)         | 01011    | <b>31.7</b> | 1.5 | <b>-8.3</b>                             | 1.5  | <b>38.5</b>               | 1.5 |
| <i>T. harzianum</i> (anamorph)         | 01087    | <b>33.4</b> | 0.6 | <b>-8.1</b>                             | 0.4  | <b>36.8</b>               | 0.3 |
| <i>T. harzianum</i> (anamorph)         | 01113    | <b>32.7</b> | 1.0 | <b>-9.0</b>                             | 0.2  | <b>36.4</b>               | 0.0 |
| <i>T. spirale</i>                      | 00977    | <b>31.5</b> | 0.2 | <b>-8.9</b>                             | 0.1  | <b>36.3</b>               | 0.6 |
| <i>T. tomentosum</i>                   | 00031    | <b>32.7</b> | 4.7 | <b>-9.5</b>                             | 0.1  | <b>37.1</b>               | 0.0 |
| <i>Trichoderma</i> sp.                 | 01015    | <b>16.6</b> | 1.4 | <b>1.3</b>                              | 0.3  | <b>26.3</b>               | 0.9 |
| <i>Trichoderma</i> sp.                 | 01077    | <b>31.6</b> | 0.6 | <b>-8.0</b>                             | 0.0  | <b>36.3</b>               | 0.2 |
| <i>Trichoderma</i> sp.                 | 01080    | <b>32.0</b> | 0.1 | <b>-8.5</b>                             | 0.3  | <b>36.7</b>               | 0.1 |
| <i>Trichoderma</i> sp.                 | 01081    | <b>32.3</b> | 1.5 | <b>-8.7</b>                             | 0.3  | <b>36.1</b>               | 0.1 |
| <i>Trichoderma</i> sp.                 | 01091    | <b>31.5</b> | 1.6 | <b>-8.1</b>                             | 0.4  | <b>34.3</b>               | 0.5 |
| <i>Trichoderma</i> sp.                 | 01092    | <b>31.2</b> | 1.4 | <b>-8.5</b>                             | 0.1  | <b>36.9</b>               | 0.1 |
| <i>Trichoderma</i> sp.                 | 01093    | <b>35.1</b> | 2.4 | <b>-8.8</b>                             | 0.3  | <b>35.7</b>               | 0.0 |
| <i>Trichoderma</i> sp.                 | 01094    | <b>27.1</b> | 2.1 | <b>-3.5</b>                             | 1.4  | <b>32.3</b>               | 0.8 |
| <i>Trichoderma</i> sp.                 | 01095    | <b>35.1</b> | 1.6 | <b>-8.7</b>                             | 0.2  | <b>35.6</b>               | 0.7 |
| <i>Trichoderma</i> sp.                 | 01102    | <b>24.6</b> | 0.4 | <b>-3.9</b>                             | 4.8  | <b>31.4</b>               | 1.9 |
| <i>Trichoderma</i> sp.                 | 01103    | <b>34.6</b> | 3.7 | <b>-9.9</b>                             | 0.1  | <b>35.8</b>               | 0.3 |
| <i>Trichoderma</i> sp.                 | 01106    | <b>29.2</b> | 0.4 | <b>-5.8</b>                             | 0.4  | <b>33.8</b>               | 0.8 |
| <i>Trichoderma</i> sp.                 | 01107    | <b>31.7</b> | 0.9 | <b>-7.6</b>                             | 0.9  | <b>36.8</b>               | 1.0 |
| <i>Trichoderma</i> sp.                 | 01109    | <b>32.1</b> | 0.7 | <b>-7.7</b>                             | 0.3  | <b>33.5</b>               | 0.2 |
| <i>Trichoderma</i> sp.                 | 01115    | <b>31.9</b> | 0.7 | <b>-7.8</b>                             | 0.2  | <b>34.2</b>               | 0.2 |
| <i>T. virens</i>                       | 00952    | <b>23.9</b> | 3.8 | <b>0.4</b>                              | 1.9  | <b>31.2</b>               | 0.4 |

MIAE: Microorganismes d'Intérêt Agro-Environnemental, UMR Agroécologie, INRA, Dijon, France

| Table S2 List of the strains tested |                      |                                                     |            |                 |                              |
|-------------------------------------|----------------------|-----------------------------------------------------|------------|-----------------|------------------------------|
| MIAE                                | Other code           | Identification                                      | Phylum     | Class           | Order                        |
| 00031                               | T32                  | <i>Trichoderma tomentosum</i>                       | Ascomycota | Sordariomycetes | Hypocreales                  |
| 00042                               | T45                  | <i>Trichoderma harzianum</i>                        | Ascomycota | Sordariomycetes | Hypocreales                  |
| 00046                               | Fo18                 | <i>Fusarium oxysporum</i> f. sp. <i>lycopersici</i> | Ascomycota | Sordariomycetes | Hypocreales                  |
| 00047                               | Fo47                 | <i>Fusarium oxysporum</i>                           | Ascomycota | Sordariomycetes | Hypocreales                  |
| 00050                               | FEQ1                 | <i>Fusarium equiseti</i>                            | Ascomycota | Sordariomycetes | Hypocreales                  |
| 00068                               | FSUB02               | <i>Fusarium subglutinans</i>                        | Ascomycota | Sordariomycetes | Hypocreales                  |
| 00149                               | 0628-001 1 B PDA     | <i>Penicillium polonicum</i>                        | Ascomycota | Eurotiomycetes  | Eurotiales                   |
| 00174                               | 0629-024 2 WA        | <i>Microdochium bolleyi</i>                         | Ascomycota | Sordariomycetes | Xylariales                   |
| 00244                               | FAC01                | <i>Fusarium acuminatum</i>                          | Ascomycota | Sordariomycetes | Hypocreales                  |
| 00285                               | FAR01                | <i>Fusarium ticinctum</i> species complex           | Ascomycota | Sordariomycetes | Hypocreales                  |
| 00286                               | FAV05                | <i>Fusarium avenaceum</i>                           | Ascomycota | Sordariomycetes | Hypocreales                  |
| 00287                               | FCHL02               | <i>Fusarium chlamydosporum</i>                      | Ascomycota | Sordariomycetes | Hypocreales                  |
| 00299                               | FPO01                | <i>Fusarium poae</i>                                | Ascomycota | Sordariomycetes | Hypocreales                  |
| 00301                               | FSA02                | <i>Fusarium sambucinum</i>                          | Ascomycota | Sordariomycetes | Hypocreales                  |
| 00304                               | FSP001               | <i>Fusarium sporotrichioides</i>                    | Ascomycota | Sordariomycetes | Hypocreales                  |
| 00306                               | FVER03               | <i>Fusarium verticillioides</i>                     | Ascomycota | Sordariomycetes | Hypocreales                  |
| 00312                               | FLANG03              | <i>Fusarium langsethiae</i>                         | Ascomycota | Sordariomycetes | Hypocreales                  |
| 00315                               | GGT                  | <i>Gaeumannomyces graminis</i> var. <i>tritici</i>  | Ascomycota | Sordariomycetes | Magnaporthales               |
| 00316                               | MNIV01               | <i>Microdochium nivale</i>                          | Ascomycota | Sordariomycetes | Xylariales                   |
| 00322                               | T4                   | <i>Botrytis cinerea</i>                             | Ascomycota | Leotiomycetes   | Helotiales                   |
| 00329                               | Bd90                 | <i>Botrytis cinerea</i>                             | Ascomycota | Leotiomycetes   | Helotiales                   |
| 00344                               | VERT03               | <i>Verticillium chlamydosporum</i>                  | Ascomycota | Sordariomycetes | Hypocreales                  |
| 00345                               | VERT02               | <i>Verticillium lecanii</i>                         | Ascomycota | Sordariomycetes | Hypocreales                  |
| 00346                               | VERT04               | <i>Verticillium nigricans</i>                       | Ascomycota | Sordariomycetes | Hypocreales                  |
| 00347                               | FoIn3                | <i>Fusarium oxysporum</i> f. sp. <i>lini</i>        | Ascomycota | Sordariomycetes | Hypocreales                  |
| 00376                               | BASF270              | <i>Fusarium graminearum</i>                         | Ascomycota | Sordariomycetes | Hypocreales                  |
| 00382                               | 0610-001 1 C β PDA   | <i>Penicillium freii</i>                            | Ascomycota | Eurotiomycetes  | Eurotiales                   |
| 00456                               |                      | <i>Fusarium pseudograminearum</i>                   | Ascomycota | Sordariomycetes | Hypocreales                  |
| 00598                               | IHEM10066            | <i>Fusarium dimerum</i>                             | Ascomycota | Sordariomycetes | Hypocreales                  |
| 00625                               | FS59                 | <i>Fusarium solani</i>                              | Ascomycota | Sordariomycetes | Hypocreales                  |
| 00690                               | FRED1                | <i>Fusarium redolens</i>                            | Ascomycota | Sordariomycetes | Hypocreales                  |
| 00836                               | FPRO3                | <i>Fusarium proliferatum</i>                        | Ascomycota | Sordariomycetes | Hypocreales                  |
|                                     | 0629-002 J 4 A β PDA | <i>Epicoccum nigrum</i>                             | Ascomycota | Dothideomycetes | mitosporic Dothideomycetes   |
|                                     | 0629-002 J 4 C PDA   | <i>Alternaria citri</i>                             | Ascomycota | Dothideomycetes | Pleosporales                 |
|                                     | 0722-001 1 D PDA     | <i>Penicillium brasilianum</i>                      | Ascomycota | Eurotiomycetes  | Eurotiales                   |
|                                     | 0628-019 2 WA        | <i>Cephalosporium</i> sp.                           | Ascomycota | Sordariomycetes | Hypocreales                  |
|                                     | 0628-019 3 β WA      | <i>Clonostachys rosea</i>                           | Ascomycota | Sordariomycetes | Hypocreales                  |
|                                     | 0629-033 2 A β WA    | <i>Gliocladium</i> sp.                              | Ascomycota | Sordariomycetes | Hypocreales                  |
| 00864                               | JCM11502             | <i>Fusarium oxysporum</i>                           | Ascomycota | Sordariomycetes | Hypocreales                  |
| 00871                               | NBRC30561            | <i>Cylindrocarpon lichenicola</i>                   | Ascomycota | Sordariomycetes | Hypocreales                  |
| 00872                               | NBRC100959           | <i>Aspergillus oryzae</i>                           | Ascomycota | Eurotiomycetes  | Eurotiales                   |
| 00938                               | SYS609               | <i>Chaetomium</i> sp.                               | Ascomycota | Sordariomycetes | Sordariales                  |
| 00939                               | SYS473               | <i>Chloridium virescens</i>                         | Ascomycota | Sordariomycetes | Chaetosphaeriales            |
| 00940                               | SYS068               | <i>Cladosporium cladosporioides</i>                 | Ascomycota | Dothideomycetes | Capnodiales                  |
| 00941                               | SYS300               | <i>Clonostachys candelabrum</i>                     | Ascomycota | Sordariomycetes | Hypocreales                  |
| 00943                               | SYS681               | <i>Davidiella tassiana</i>                          | Ascomycota | Dothideomycetes | Capnodiales                  |
| 00945                               | SYS026               | <i>Fusarium oxysporum</i>                           | Ascomycota | Sordariomycetes | Hypocreales                  |
| 00946                               | SYS158               | <i>Fusarium oxysporum</i>                           | Ascomycota | Sordariomycetes | Hypocreales                  |
| 00947                               | SYS400               | <i>Fusarium oxysporum</i>                           | Ascomycota | Sordariomycetes | Hypocreales                  |
| 00948                               | SYS636               | <i>Fusarium oxysporum</i>                           | Ascomycota | Sordariomycetes | Hypocreales                  |
| 00949                               | SYS350               | <i>Geomyces destructans</i>                         | Ascomycota | Leotiomycetes   | Leotiomycetes incertae sedis |
| 00950                               | SYS331               | <i>Hypocrea koningii</i>                            | Ascomycota | Sordariomycetes | Hypocreales                  |
| 00951                               | SYS129               | <i>Hypocrea lixii</i>                               | Ascomycota | Sordariomycetes | Hypocreales                  |
| 00952                               | SYS607               | <i>Trichoderma virens</i>                           | Ascomycota | Sordariomycetes | Hypocreales                  |
| 00953                               | SYS540               | <i>Metarhizium anisopliae</i>                       | Ascomycota | Sordariomycetes | Hypocreales                  |
| 00954                               | SYS868               | <i>Microsphaeropsis arundinis</i>                   | Ascomycota | -               | mitosporic Ascomycota        |
| 00960                               | SYS418               | <i>Penicillium adametzi</i>                         | Ascomycota | Eurotiomycetes  | Eurotiales                   |
| 00961                               | SYS570               | <i>Penicillium canescens</i>                        | Ascomycota | Eurotiomycetes  | Eurotiales                   |
| 00962                               | SYS078               | <i>Penicillium citreonigrum</i>                     | Ascomycota | Eurotiomycetes  | Eurotiales                   |
| 00963                               | SYS483               | <i>Penicillium decaturense</i>                      | Ascomycota | Eurotiomycetes  | Eurotiales                   |
| 00964                               | SYS386               | <i>Penicillium fagi</i>                             | Ascomycota | Eurotiomycetes  | Eurotiales                   |
| 00965                               | SYS203               | <i>Penicillium melinii</i>                          | Ascomycota | Eurotiomycetes  | Eurotiales                   |
| 00966                               | SYS846               | <i>Penicillium montanense</i>                       | Ascomycota | Eurotiomycetes  | Eurotiales                   |
| 00967                               | SYS536               | <i>Penicillium pinophilum</i>                       | Ascomycota | Eurotiomycetes  | Eurotiales                   |
| 00968                               | SYS875               | <i>Phialocephala</i> sp.                            | Ascomycota | Sordariomycetes | Ophiostomatales              |
| 00969                               | SYS615               | <i>Phoma americana</i>                              | Ascomycota | Dothideomycetes | Pleosporales                 |
| 00970                               | SYS088               | <i>Phoma pomorum</i>                                | Ascomycota | Dothideomycetes | Pleosporales                 |
| 00971                               | SYS327               | <i>Pochonia bulbilosa</i>                           | Ascomycota | Sordariomycetes | Hypocreales                  |

|       |        |                                                                    |            |                       |                            |
|-------|--------|--------------------------------------------------------------------|------------|-----------------------|----------------------------|
| 00973 | SYS805 | <i>Trichoderma asperellum</i>                                      | Ascomycota | Sordariomycetes       | Hypocreales                |
| 00974 | SYS877 | <i>Trichoderma gamsii</i>                                          | Ascomycota | Sordariomycetes       | Hypocreales                |
| 00975 | SYS029 | <i>Trichoderma hamatum</i>                                         | Ascomycota | Sordariomycetes       | Hypocreales                |
| 00976 | SYS284 | <i>Trichoderma koningiopsis</i>                                    | Ascomycota | Sordariomycetes       | Hypocreales                |
| 00977 | SYS624 | <i>Trichoderma spirale</i>                                         | Ascomycota | Sordariomycetes       | Hypocreales                |
| 00978 | SYS629 | <i>Trichoderma viride</i>                                          | Ascomycota | Sordariomycetes       | Hypocreales                |
| 00982 | SYS523 | <i>Zalerion varium</i>                                             | Ascomycota | -                     | mitosporic Ascomycota      |
| 00984 | SYS310 | <i>Penicillium griseolum</i>                                       | Ascomycota | Eurotiomycetes        | Eurotiales                 |
| 00985 | SYS610 | <i>Chaetomium</i> sp.                                              | Ascomycota | Sordariomycetes       | Sordariales                |
| 00986 | SYS538 | <i>Chaetomium</i> sp.                                              | Ascomycota | Sordariomycetes       | Sordariales                |
| 00987 | SYS051 | <i>Chaetomium piluliferum / Humicola fuscoatra</i>                 | Ascomycota | Sordariomycetes       | Sordariales                |
| 00989 | SYS022 | <i>Chaetomium</i> sp / <i>Humicola fuscoatra</i>                   | Ascomycota | Sordariomycetes       | Sordariales                |
| 00990 | SYS971 | <i>Chaetomiaceae</i>                                               | Ascomycota | Sordariomycetes       | Sordariales                |
| 00991 | SYS085 | <i>Fusarium oxysporum</i>                                          | Ascomycota | Sordariomycetes       | Hypocreales                |
| 00992 | SYS822 | <i>Penicillium citreonigrum</i>                                    | Ascomycota | Eurotiomycetes        | Eurotiales                 |
| 00993 | SYS054 | <i>Fusarium oxysporum</i>                                          | Ascomycota | Sordariomycetes       | Hypocreales                |
| 00994 | SYS091 | <i>Fusarium oxysporum</i>                                          | Ascomycota | Sordariomycetes       | Hypocreales                |
| 00995 | SYS125 | <i>Fusarium oxysporum</i>                                          | Ascomycota | Sordariomycetes       | Hypocreales                |
| 00996 | SYS159 | <i>Fusarium oxysporum</i>                                          | Ascomycota | Sordariomycetes       | Hypocreales                |
| 00997 | SYS469 | <i>Fusarium oxysporum</i>                                          | Ascomycota | Sordariomycetes       | Hypocreales                |
| 00998 | SYS500 | <i>Fusarium oxysporum</i>                                          | Ascomycota | Sordariomycetes       | Hypocreales                |
| 00999 | SYS591 | <i>Fusarium oxysporum</i>                                          | Ascomycota | Sordariomycetes       | Hypocreales                |
| 01000 | SYS661 | <i>Fusarium oxysporum</i>                                          | Ascomycota | Sordariomycetes       | Hypocreales                |
| 01001 | SYS795 | <i>Fusarium oxysporum</i>                                          | Ascomycota | Sordariomycetes       | Hypocreales                |
| 01002 | SYS851 | <i>Fusarium oxysporum</i>                                          | Ascomycota | Sordariomycetes       | Hypocreales                |
| 01003 | SYS950 | <i>Fusarium oxysporum</i>                                          | Ascomycota | Sordariomycetes       | Hypocreales                |
| 01004 | SYS417 | <i>Fusarium aethiopicum / Fusarium culmorum / Fusarium vorosii</i> | Ascomycota | Sordariomycetes       | Hypocreales                |
| 01005 | SYS788 | <i>Chaetomium</i> sp. / <i>Humicola</i> sp.                        | Ascomycota | Sordariomycetes       | Sordariales                |
| 01006 | SYS146 | <i>Penicillium aculeatum / Penicillium pinophilum</i>              | Ascomycota | Eurotiomycetes        | Eurotiales                 |
| 01007 | SYS213 | <i>Penicillium adametzii</i>                                       | Ascomycota | Eurotiomycetes        | Eurotiales                 |
| 01008 | SYS550 | <i>Penicillium adametzii</i>                                       | Ascomycota | Eurotiomycetes        | Eurotiales                 |
| 01009 | SYS577 | <i>Penicillium melinii</i>                                         | Ascomycota | Eurotiomycetes        | Eurotiales                 |
| 01010 | SYS461 | <i>Penicillium</i> sp.                                             | Ascomycota | Eurotiomycetes        | Eurotiales                 |
| 01011 | SYS579 | <i>Trichoderma harzianum</i> (anamorph)                            | Ascomycota | Sordariomycetes       | Hypocreales                |
| 01012 | SYS468 | <i>Hypocrea chlorospora</i>                                        | Ascomycota | Sordariomycetes       | Hypocreales                |
| 01013 | SYS059 | <i>Hypocrea koningii</i>                                           | Ascomycota | Sordariomycetes       | Hypocreales                |
| 01014 | SYS002 | <i>Hypocrea lixii</i>                                              | Ascomycota | Sordariomycetes       | Hypocreales                |
| 01015 | SYS239 | <i>Trichoderma koningiopsis / Hypocrea koningii</i>                | Ascomycota | Sordariomycetes       | Hypocreales                |
| 01047 | SYS090 | <i>Phoma americana / Epicoccum americana</i>                       | Ascomycota | Dothideomycetes       | Pleosporales               |
| 01048 | SYS204 | <i>Eupenicillium pinetorum / Penicillium montanense</i>            | Ascomycota | Eurotiomycetes        | Eurotiales                 |
| 01050 | SYS281 | <i>Leptodontidium</i> sp.                                          | Ascomycota | mitosporic Ascomycota | mitosporic Ascomycota      |
| 01053 | SYS368 | <i>Penicillium citreonigrum</i>                                    | Ascomycota | Eurotiomycetes        | Eurotiales                 |
| 01054 | SYS355 | <i>Tolypocladium cylindrosporum</i>                                | Ascomycota | Sordariomycetes       | Hypocreales                |
| 01057 | SYS543 | <i>Acremonium strictum</i>                                         | Ascomycota | Sordariomycetes       | Hypocreales                |
| 01058 | SYS632 | <i>Clonostachys candelabrum</i>                                    | Ascomycota | Sordariomycetes       | Hypocreales                |
| 01060 | SYS651 | <i>Leptosphaeria</i> sp.                                           | Ascomycota | Dothideomycetes       | Pleosporales               |
| 01061 | SYS818 | <i>Clonostachys candelabrum</i>                                    | Ascomycota | Sordariomycetes       | Hypocreales                |
| 01062 | SYS794 | <i>Eucasphaeria capensis</i>                                       | Ascomycota | Sordariomycetes       | Hypocreales                |
| 01063 | SYS772 | <i>Galactomyces geotrichum</i>                                     | Ascomycota | Saccharomycetes       | Saccharomycetales;         |
| 01064 | SYS797 | <i>Gibbellulopsis nigrescens / Verticillium dahliae</i>            | Ascomycota | Sordariomycetes       | Glomeriales                |
| 01065 | SYS793 | <i>Microsphaeropsis arundinis</i>                                  | Ascomycota | mitosporic Ascomycota | mitosporic Ascomycota      |
| 01066 | SYS799 | <i>Myrmecridium</i> sp.                                            | Ascomycota | Sordariomycetes       | mitosporic Sordariomycetes |
| 01067 | SYS773 | <i>Paraconiothyrium sporulosum / Coniothyrium</i> sp               | Ascomycota | Dothideomycetes       | Pleosporales               |
| 01069 | SYS824 | <i>Chloridium virescens</i>                                        | Ascomycota | Sordariomycetes       | Chaetosphaeriales          |
| 01070 | SYS845 | <i>Chloridium virescens</i>                                        | Ascomycota | Sordariomycetes       | Chaetosphaeriales          |
| 01073 | SYS894 | <i>Tolypocladium inflatum</i>                                      | Ascomycota | Sordariomycetes       | Hypocreales                |
| 01074 | SYS996 | <i>Chloridium</i> sp                                               | Ascomycota | Sordariomycetes       | Chaetosphaeriales          |
| 01075 | SYS994 | <i>Paraconiothyrium sporulosum</i>                                 | Ascomycota | Dothideomycetes       | Pleosporales               |
| 01076 |        | <i>Trichoderma</i> sp.                                             | Ascomycota | Sordariomycetes       | Hypocreales                |
| 01077 |        | <i>Trichoderma</i> sp.                                             | Ascomycota | Sordariomycetes       | Hypocreales                |
| 01078 |        | <i>Trichoderma</i> sp.                                             | Ascomycota | Sordariomycetes       | Hypocreales                |
| 01079 |        | <i>Hypocrea rodmanii</i>                                           | Ascomycota | Sordariomycetes       | Hypocreales                |
| 01080 |        | <i>Trichoderma</i> sp.                                             | Ascomycota | Sordariomycetes       | Hypocreales                |
| 01081 |        | <i>Trichoderma</i> sp.                                             | Ascomycota | Sordariomycetes       | Hypocreales                |
| 01082 |        | <i>Trichoderma</i> sp.                                             | Ascomycota | Sordariomycetes       | Hypocreales                |
| 01083 |        | <i>Trichoderma viride</i>                                          | Ascomycota | Sordariomycetes       | Hypocreales                |
| 01084 |        | <i>Trichoderma koningiopsis / Hypocrea koningii</i>                | Ascomycota | Sordariomycetes       | Hypocreales                |
| 01085 |        | <i>Trichoderma</i> sp.                                             | Ascomycota | Sordariomycetes       | Hypocreales                |
| 01086 |        | <i>Hypocrea koningii</i>                                           | Ascomycota | Sordariomycetes       | Hypocreales                |
| 01087 |        | <i>Trichoderma harzianum</i> (anamorph)                            | Ascomycota | Sordariomycetes       | Hypocreales                |

|       |                   |                                                                               |                      |                 |                |
|-------|-------------------|-------------------------------------------------------------------------------|----------------------|-----------------|----------------|
| 01088 |                   | <i>Trichoderma</i> sp.                                                        | Ascomycota           | Sordariomycetes | Hypocreales    |
| 01089 |                   | <i>Trichoderma</i> sp.                                                        | Ascomycota           | Sordariomycetes | Hypocreales    |
| 01090 |                   | <i>Trichoderma</i> sp.                                                        | Ascomycota           | Sordariomycetes | Hypocreales    |
| 01091 |                   | <i>Trichoderma</i> sp.                                                        | Ascomycota           | Sordariomycetes | Hypocreales    |
| 01092 |                   | <i>Trichoderma</i> sp.                                                        | Ascomycota           | Sordariomycetes | Hypocreales    |
| 01093 |                   | <i>Trichoderma</i> sp.                                                        | Ascomycota           | Sordariomycetes | Hypocreales    |
| 01094 |                   | <i>Trichoderma</i> sp.                                                        | Ascomycota           | Sordariomycetes | Hypocreales    |
| 01095 |                   | <i>Trichoderma</i> sp.                                                        | Ascomycota           | Sordariomycetes | Hypocreales    |
| 01096 |                   | <i>Trichoderma</i> sp.                                                        | Ascomycota           | Sordariomycetes | Hypocreales    |
| 01097 |                   | <i>Trichoderma</i> sp.                                                        | Ascomycota           | Sordariomycetes | Hypocreales    |
| 01098 |                   | <i>Hypocrea lixii</i>                                                         | Ascomycota           | Sordariomycetes | Hypocreales    |
| 01099 |                   | <i>Trichoderma</i> sp.                                                        | Ascomycota           | Sordariomycetes | Hypocreales    |
| 01100 |                   | <i>Trichoderma</i> sp.                                                        | Ascomycota           | Sordariomycetes | Hypocreales    |
| 01101 |                   | <i>Trichoderma</i> sp.                                                        | Ascomycota           | Sordariomycetes | Hypocreales    |
| 01102 |                   | <i>Trichoderma</i> sp.                                                        | Ascomycota           | Sordariomycetes | Hypocreales    |
| 01103 |                   | <i>Trichoderma</i> sp.                                                        | Ascomycota           | Sordariomycetes | Hypocreales    |
| 01104 |                   | <i>Trichoderma asperellum</i>                                                 | Ascomycota           | Sordariomycetes | Hypocreales    |
| 01105 |                   | <i>Trichoderma</i> sp.                                                        | Ascomycota           | Sordariomycetes | Hypocreales    |
| 01106 |                   | <i>Trichoderma koningii</i> / <i>Trichoderma fertile</i> / <i>Hypocrea</i> f. | Ascomycota           | Sordariomycetes | Hypocreales    |
| 01107 |                   | <i>Trichoderma</i> sp.                                                        | Ascomycota           | Sordariomycetes | Hypocreales    |
| 01108 |                   | <i>Trichoderma asperellum</i>                                                 | Ascomycota           | Sordariomycetes | Hypocreales    |
| 01109 |                   | <i>Trichoderma</i> sp.                                                        | Ascomycota           | Sordariomycetes | Hypocreales    |
| 01110 |                   | <i>Hypocrea koningii</i>                                                      | Ascomycota           | Sordariomycetes | Hypocreales    |
| 01111 |                   | <i>Trichoderma</i> sp.                                                        | Ascomycota           | Sordariomycetes | Hypocreales    |
| 01112 |                   | <i>Trichoderma</i> sp.                                                        | Ascomycota           | Sordariomycetes | Hypocreales    |
| 01113 |                   | <i>Trichoderma harzianum</i> (anamorph)                                       | Ascomycota           | Sordariomycetes | Hypocreales    |
| 01115 |                   | <i>Trichoderma</i> sp.                                                        | Ascomycota           | Sordariomycetes | Hypocreales    |
| 01117 |                   | <i>Pestalotiopsis</i> sp.                                                     | Ascomycota           | Sordariomycetes | Xylariales     |
| 01118 |                   | <i>Myrothecium</i> sp.                                                        | Ascomycota           | Sordariomycetes | Hypocreales    |
| 01119 |                   | <i>Beauveria</i> sp.                                                          | Ascomycota           | Sordariomycetes | Hypocreales    |
| 01120 |                   | <i>Paraphaeosphaeria</i> sp.                                                  | Ascomycota           | Dothideomycetes | Pleosporales   |
| 01121 |                   | <i>Metarhizium anisopliae</i>                                                 | Ascomycota           | Sordariomycetes | Hypocreales    |
| 01122 |                   | <i>Coniothyrium</i> sp.                                                       | Ascomycota           | Dothideomycetes | Pleosporales   |
| 01515 | 0610-002 I A PDA  | <i>Colletotrichum coccodes</i>                                                | Ascomycota           | Sordariomycetes | Glomerellales  |
| 01518 | I05               | <i>Aspergillus</i> sp.                                                        | Ascomycota           | Eurotiomycetes  | Eurotiales     |
| 01519 | SYS762            | <i>Fusarium</i> sp.                                                           | Ascomycota           | Sordariomycetes | Hypocreales    |
| 01520 | SYS673            | <i>Penicillium</i> sp.                                                        | Ascomycota           | Eurotiomycetes  | Eurotiales     |
| 00052 | C03               | <i>Rhizoctonia solani</i> AG 1-1B                                             | Basidiomycota        | Agaricomycetes  | Cantharellales |
| 00056 | H01               | <i>Rhizoctonia solani</i> AG 2-3                                              | Basidiomycota        | Agaricomycetes  | Cantharellales |
| 00057 | U01               | <i>Rhizoctonia solani</i> AG 2 BI                                             | Basidiomycota        | Agaricomycetes  | Cantharellales |
| 00058 | G05               | <i>Rhizoctonia solani</i> AG 2-2IV                                            | Basidiomycota        | Agaricomycetes  | Cantharellales |
| 00059 | J02               | <i>Rhizoctonia solani</i> AG 4                                                | Basidiomycota        | Agaricomycetes  | Cantharellales |
| 00071 | G10               | <i>Rhizoctonia solani</i> AG 2-2-LP                                           | Basidiomycota        | Agaricomycetes  | Cantharellales |
| 00078 | P01               | <i>Rhizoctonia solani</i> AG 8                                                | Basidiomycota        | Agaricomycetes  | Cantharellales |
| 00195 | 0629-048 I B β WA | <i>Bjerkandera adusta</i>                                                     | Basidiomycota        | Agaricomycetes  | Polyporales    |
| 00979 | SYS325            | <i>Trichosporon porosum</i>                                                   | Basidiomycota        | Tremellomycetes | Tremellales    |
| 00009 | 0729-005 I A PDA  | <i>Mucor hiemalis</i>                                                         | Fungi incertae sedis | -               | Mucorales      |
| 00377 | 0629-006 I PDA    | <i>Absidia glauca</i>                                                         | Fungi incertae sedis | -               | Mucorales      |
| 00406 | 0728-091 B PDA    | <i>Mucor fragilis</i>                                                         | Fungi incertae sedis | -               | Mucorales      |
| 00942 | SYS321            | <i>Cunninghamella elegans</i>                                                 | Fungi incertae sedis | -               | Mucorales      |
| 00980 | SYS480            | <i>Umbelopsis autotrophica</i>                                                | Fungi incertae sedis | -               | Mucorales      |
| 00981 | SYS358            | <i>Umbelopsis isabellina</i>                                                  | Fungi incertae sedis | -               | Mucorales      |
| 00983 | SYS070            | <i>Zygorhynchus moelleri</i>                                                  | Fungi incertae sedis | -               | Mucorales      |
| 01049 | SYS245            | <i>Zygorhynchus moelleri</i>                                                  | Fungi incertae sedis | -               | Mucorales      |
| 01051 | SYS324            | <i>Umbelopsis autotrophica</i>                                                | Fungi incertae sedis | -               | Mucorales      |
| 01052 | SYS334            | <i>Umbelopsis autotrophica</i>                                                | Fungi incertae sedis | -               | Mucorales      |
| 01055 | SYS440            | <i>Zygorhynchus moelleri</i>                                                  | Fungi incertae sedis | -               | Mucorales      |
| 01056 | SYS527            | <i>Absidia glauca</i>                                                         | Fungi incertae sedis | -               | Mucorales      |
| 01068 | SYS707            | <i>Umbelopsis isabellina</i>                                                  | Fungi incertae sedis | -               | Mucorales      |
| 01071 | SYS892            | <i>Umbelopsis autotrophica</i>                                                | Fungi incertae sedis | -               | Mucorales      |
| 01072 | SYS843            | <i>Umbelopsis isabellina</i>                                                  | Fungi incertae sedis | -               | Mucorales      |
| 01123 |                   | <i>Rhizopus oryzae</i>                                                        | Fungi incertae sedis | -               | Mucorales      |
| 00955 | SYS775            | <i>Mortierella elongata</i>                                                   | Fungi incertae sedis | -               | Mortierellales |
| 00956 | SYS899            | <i>Mortierella gamsii</i>                                                     | Fungi incertae sedis | -               | Mortierellales |
| 00957 | SYS356            | <i>Mortierella horticola</i>                                                  | Fungi incertae sedis | -               | Mortierellales |
| 00958 | SYS402            | <i>Mortierella humilis</i>                                                    | Fungi incertae sedis | -               | Mortierellales |
| 00012 | PAR400            | <i>Phytophthora parasitica</i>                                                | -                    | oomycetes       | Peronosporales |
| 00013 | OP4               | <i>Pythium aphanidermatum</i>                                                 | -                    | oomycetes       | Pythiales      |
| 00018 | Py PC1            | <i>Pythium sylvaticum</i>                                                     | -                    | oomycetes       | Pythiales      |

Maeda et al., Table S3

| Table S3 Summary of the strains tested |                |                  |
|----------------------------------------|----------------|------------------|
| Order                                  | Strains tested | Positive strains |
| Hypocreales                            | 113            | 50               |
| Eurotiales                             | 23             | 8                |
| Mucorales                              | 16             | 1                |
| Pleosporales                           | 9              | 1                |
| Cantharellales                         | 7              |                  |
| Sordariales                            | 7              | 5                |
| Chaetosphaeriales                      | 4              | 3                |
| Mortierellales                         | 4              |                  |
| Capnodiales                            | 2              |                  |
| Xylariales                             | 3              |                  |
| Glomerellales                          | 2              | 1                |
| Helotiales                             | 2              |                  |
| Pythiales                              | 2              |                  |
| Ophiostomatales                        | 1              | 1                |
| Peronosporales                         | 1              |                  |
| Magnaporthales                         | 1              |                  |
| Polyporales                            | 1              |                  |
| Tremellales                            | 1              |                  |
| Saccharomycetales                      | 1              |                  |
| Leotiomycetes incertae sedis           | 1              |                  |
| mitosporic Sordariomycetes             | 1              |                  |
| mitosporic Dothideomycetes             | 1              |                  |
| mitosporic Ascomycota                  | 4              |                  |
|                                        | 207            | 70               |
